# Supplementary material for: Rationale of the effects from dopants on C–H bond activation for sp2hybridized nanostructured carbon catalysts
Source: Royal Society of Chemistry journal article supplement (doi:10.1039/c5nr05759k), 2015-01-01
Supplement: c5nr05759k1.pdf [file c5nr05759k1.pdf]

## Supporting Information

The calculations reported here are performed by using periodic, spin-polarized DFT as implemented in Vienna ab initio program package (VASP).<sup>1</sup> The electron-ion interactions are described by the projector augmented wave (PAW) method proposed by Blöchl<sup>2</sup> and implemented by Kresse.<sup>3</sup> RPBE functional<sup>4</sup> is used as exchange-correlation functional approximation and a plane wave basis set with an energy cutoff of 400 eV is used. Only gamma point is used for the Brillouin zone sampling. To model the oxygen functional groups, a graphene sheet in a cubic cell with a 26.72x16.04x15.00 Å for x, y, z dimension is used and the periodic condition is employed along the y direction. All atoms in the cell are allowed to relax during the structure optimization and the optimization is stopped when the force residue on the atom is smaller than 0.02 eV/Å. The reaction pathway and barriers are calculated by using the climbing image nudged elastic band (CI-NEB) method.<sup>5</sup> More detailed information such as k points test can be seen in our previous study.<sup>6</sup> The configuration of the doping atoms (B, N and S) is chosen as graphitic type. The binding energy is defined as:

$$E_b = E_{tot} - E_{slab} - E_{C_2H_5}; \quad (1)$$

Where  $E_{tot}$  is the total energy after the binding of  $C_2H_5$  on the catalyst;  $E_{slab}$  is the energy of the catalyst alone;  $E_{C_2H_5}$  is the energy of the ethane radical in the gas phase. The dissociation energy is defined as:

$$E_{dis} = E_{tot} - E_{slab} - E_{C_2H_6}; \quad (2)$$

Where  $E_{tot}$  is the total energy after the first C-H bond cleavage of ethane on the catalyst resulting in a ethane radical in the gas phase (the final state in Figure S2);  $E_{slab}$  is the energy of the clean slab alone;  $E_{C_2H_6}$  is the energy of the ethane molecule.

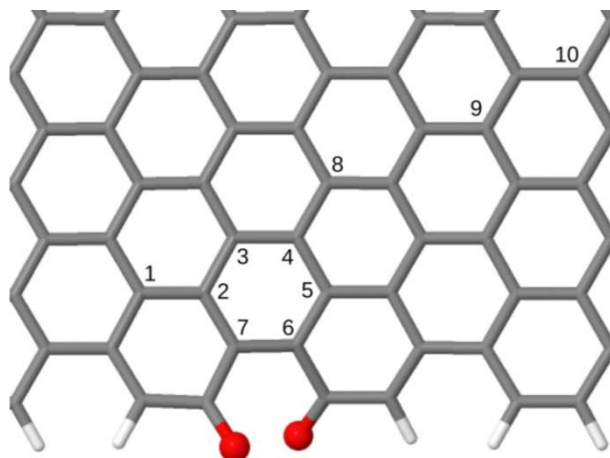

Figure S1: The doping positions on the carbon catalyst. The numbers represent the doping positions. For boron (B) and nitrogen (N) doping, ten positions are calculated; for sulphur(S) doping, only positions marked as 1 and 2 are calculated. Color code: carbon is gray, hydrogen is white, and oxygen is red.

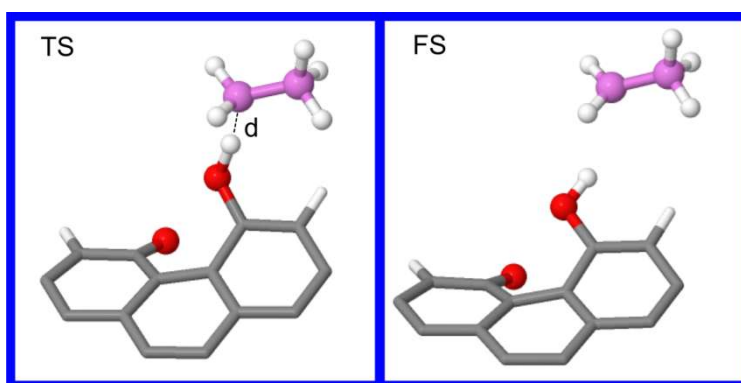

Figure S2: The transition state (TS) and final state (FS) of the first C-H bond cleavage of ethane on the undoped catalyst, in which  $d$  is the length of the C-H bond at the transition state. Color code: carbon on the substrate is gray, carbon in ethane is violet, hydrogen is white, and oxygen is red.

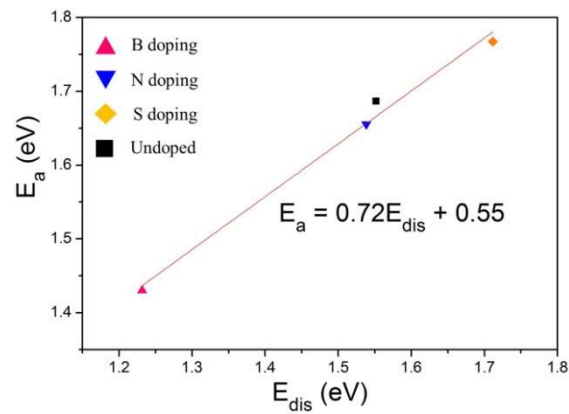

Figure S3: The methane molecule activation on the undoped and doped catalysts and the relation between the dissociation energy ( $E_{\text{dis}}$ ) and the activation energy ( $E_a$ ). The graphitic dopants are considered in the calculations.

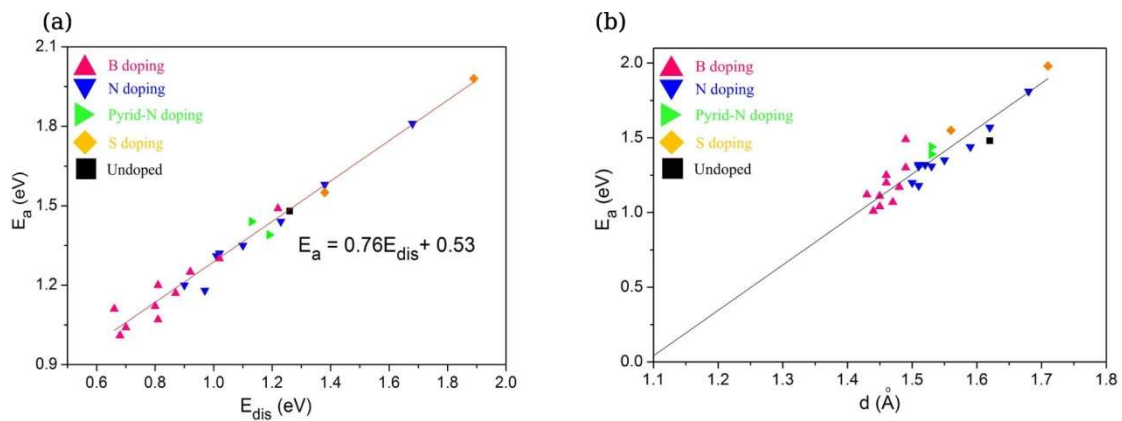

Figure S4: The pyridine nitrogen is included in the data set shown in Figure 2 and 3. (a) The relation between the dissociation energy and the activation energy. (b) The relation between the breaking bond distance and the activation energy.

Table S1: The length (d) of the C-H bond in ethane at the transition state on both the undoped and doped catalysts, which d is indicated in Figure S2. The unit is Å.

| Doping positions | 1    | 2    | 3    | 4    | 5    | 6    | 7    | 8    | 9    | 10   |
|------------------|------|------|------|------|------|------|------|------|------|------|
| undoped          | 1.57 |      |      |      |      |      |      |      |      |      |
| B doped          | 1.48 | 1.43 | 1.44 | 1.45 | 1.49 | 1.45 | 1.47 | 1.48 | 1.46 | 1.46 |
| N doped          | 1.62 | 1.59 | 1.55 | 1.53 | 1.51 | 1.51 | 1.68 | 1.52 | 1.50 | 1.51 |
| S doped          | 1.71 | 1.56 |      |      |      |      |      |      |      |      |

### References

1. (a) G. Kresse and J. Furthmüller, *Comput. Mater. Sci.*, 1996, **6**, 15; (b) G. Kresse and J. Furthmüller, *Phys. Rev. B*, 1996, **54**, 11169.
2. P. E. Blöchl, *Phys. Rev. B*, 1994, **50**, 17953.
3. G. Kresse and D. Joubert, *Phys. Rev. B*, 1999, **59**, 1758.
4. B. Hammer, L. B. Hansen and J. K. Nørskov, *Phys. Rev. B*, 1999, **59**, 7413.
5. G. Henkelman, B. P. Uberuaga and H. Jonsson, *J. Chem. Phys.*, 2000, **113**, 9901.
6. S. Mao, B. Li and D. Su, *J. Mater. Chem. A*, 2014, **2**, 5287.
